# Supplementary material
Source: PubMed Central journal article supplement (PMC3539253)
Supplement: Supp_Data.pdf [file Supp_Data.pdf]

## Supplementary Data



**SUPPLEMENTARY FIG. S1.** Constitutively active Akt (ca-AKT) confers resistance to tumor necrosis factor-related apoptosis-inducing ligand (TRAIL)-induced apoptosis in **(A)** TPC1 and **(B)** BCPAP cells. Total of  $8 \times 10^4$  of TPC1 and BCPAP cells were cultured in 6-well plates and transfected with either an empty vector (Vector) or a ca-Akt expressing vector and cultured for 36 hours. The cells were treated with 25 ng/mL (TPC1) or 50 ng/mL (BCPAP) of TRAIL for an additional 6 hours. The cells were then harvested and stained with PE-labeled anti-caspase-3 antibody and subjected to FACS analysis. Data show the percentages of PE-positive apoptotic cells.
